# Supplementary material for: Comprehensive Cancer-Predisposition Gene Testing in an Adult Multiple Primary Tumor Series Shows a Broad Range of Deleterious Variants and Atypical Tumor Phenotypes
Source: PubMed Central journal article supplement (PMC6037202; doi:10.1016/j.ajhg.2018.04.013), 2018-06-14
Supplement: mmc1.pdf [file mmc1.pdf]

## Supplemental Data

### **Comprehensive Cancer-Predisposition Gene Testing in an Adult Multiple Primary Tumor Series Shows a Broad Range of Deleterious Variants and Atypical Tumor Phenotypes**

James Whitworth, Philip S. Smith, Jose-Ezequiel Martin, Hannah West, Andrea Luchetti, Faye Rodger, Graeme Clark, Keren Carss, Jonathan Stephens, Kathleen Stirrups, Chris Penkett, Rutendo Mapeta, Sofie Ashford, Karyn Megy, Hassan Shakeel, Munaza Ahmed, Julian Adlard, Julian Barwell, Carole Brewer, Ruth T. Casey, Ruth Armstrong, Trevor Cole, Dafydd Gareth Evans, Florentia Fostira, Lynn Greenhalgh, Helen Hanson, Alex Henderson, Jonathan Hoffman, Louise Izatt, Ajith Kumar, Ava Kwong, Fiona Laloo, Kai Ren Ong, Joan Paterson, Soo-Mi Park, Rakefet Chen-Shtoyerman, Claire Searle, Lucy Side, Anne-Bine Skytte, Katie Snape, Emma R. Woodward, NIHR BioResource Rare Diseases Consortium, Marc D. Tischkowitz, and Eamonn R. Maher

# Supplemental Data

## Supplemental Figures

### Figure S1 - SNV/indel workflow

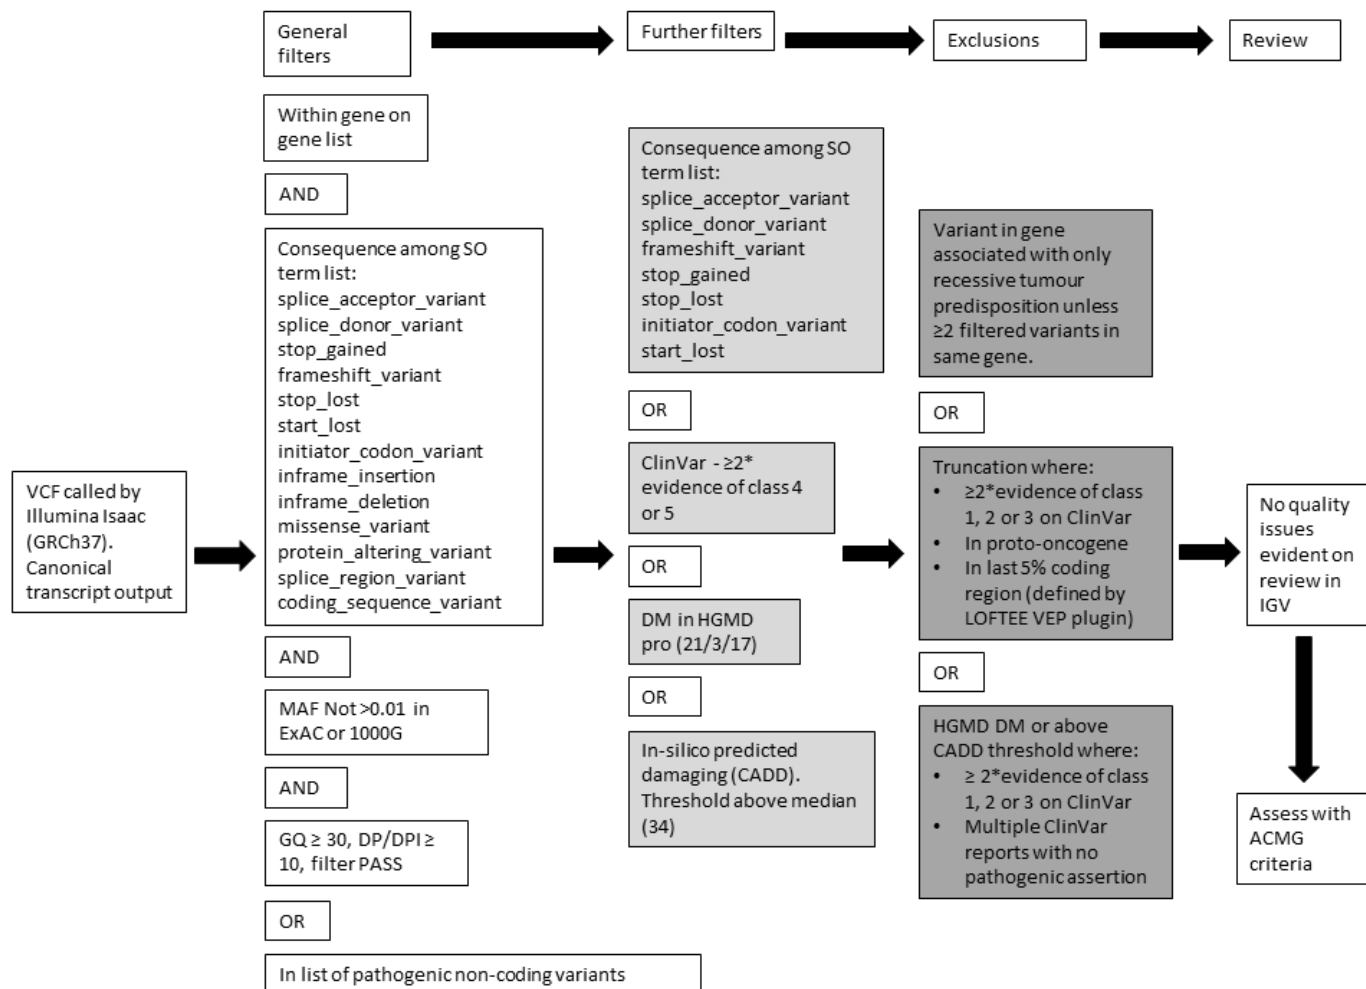

**Figure S2 - Structural variant workflow**

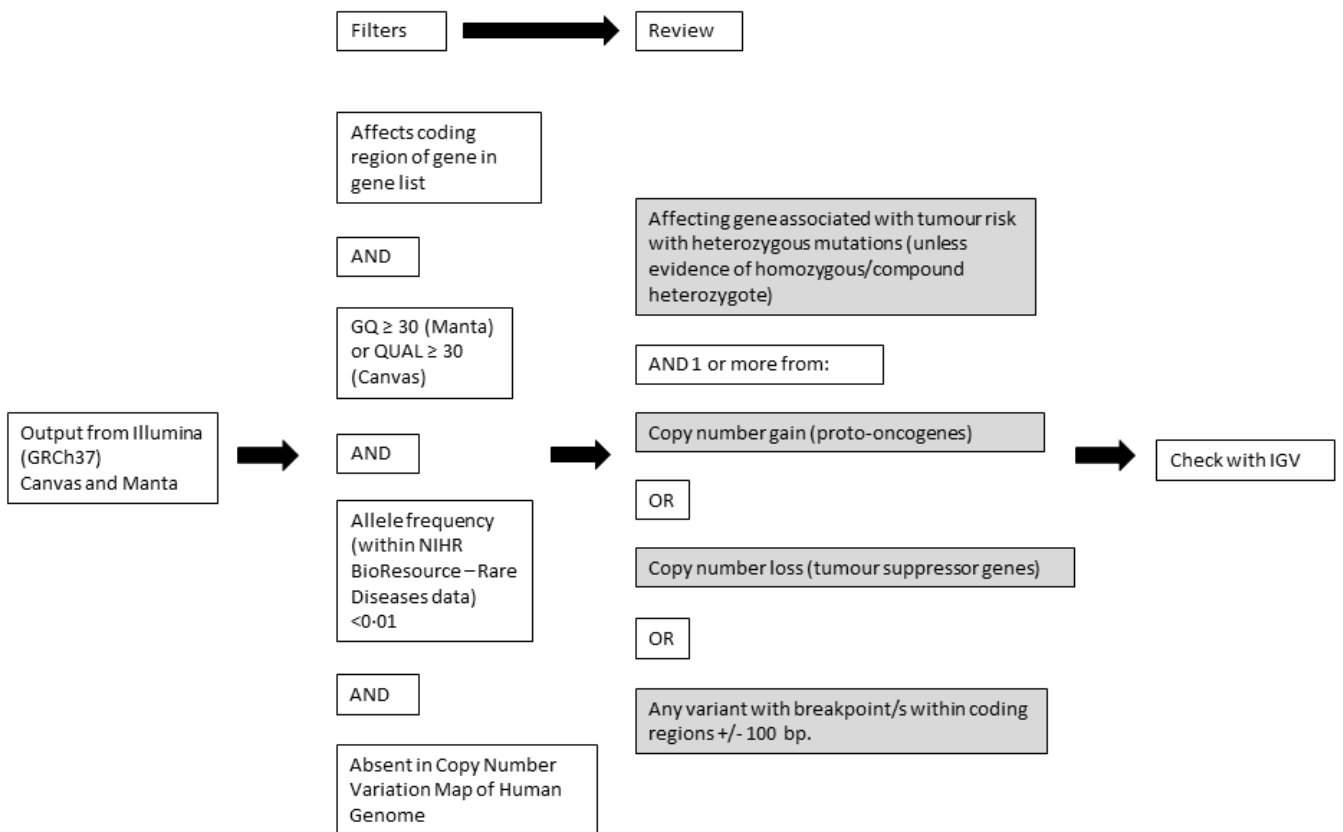

## Supplemental tables

**Table S2 – Genes sequenced by Illumina TruSight Cancer panel on list of 83 analyzed genes**

|               |               |                |                |
|---------------|---------------|----------------|----------------|
| <i>AIP</i>    | <i>DICER1</i> | <i>MLH1</i>    | <i>RUNX1</i>   |
| <i>ALK</i>    | <i>EGFR</i>   | <i>MSH2</i>    | <i>SDHAF2</i>  |
| <i>APC</i>    | <i>EPCAM</i>  | <i>MSH6</i>    | <i>SDHB</i>    |
| <i>ATM</i>    | <i>ERCC2</i>  | <i>MUTYH</i>   | <i>SDHC</i>    |
| <i>BAP1</i>   | <i>ERCC3</i>  | <i>NF1</i>     | <i>SDHD</i>    |
| <i>BMPR1A</i> | <i>ERCC4</i>  | <i>NF2</i>     | <i>SMAD4</i>   |
| <i>BRCA1</i>  | <i>ERCC5</i>  | <i>PALB2</i>   | <i>SMARCB1</i> |
| <i>BRCA2</i>  | <i>EXT1</i>   | <i>PHOX2B</i>  | <i>STK11</i>   |
| <i>BRIP1</i>  | <i>EXT2</i>   | <i>PMS2</i>    | <i>SUFU</i>    |
| <i>CDC73</i>  | <i>FH</i>     | <i>PRKAR1A</i> | <i>TMEM127</i> |
| <i>CDH1</i>   | <i>FLCN</i>   | <i>PTCH1</i>   | <i>TP53</i>    |
| <i>CDK4</i>   | <i>GATA2</i>  | <i>PTEN</i>    | <i>TSC1</i>    |
| <i>CDKN2A</i> | <i>HNF1A</i>  | <i>RAD51C</i>  | <i>TSC2</i>    |
| <i>CEBPA</i>  | <i>KIT</i>    | <i>RAD51D</i>  | <i>VHL</i>     |
| <i>CHEK2</i>  | <i>MAX</i>    | <i>RB1</i>     | <i>WT1</i>     |
| <i>CYLD</i>   | <i>MEN1</i>   | <i>RET</i>     | <i>XPA</i>     |
| <i>DDB2</i>   | <i>MET</i>    | <i>RHBDF2</i>  | <i>XPC</i>     |

**Table S7 – Comparison of tumor combinations in series vs East Anglia Registry 2009-2014.**

| Cancer A      | Cancer B       | Data source | Combination count | % total | Combination type makes up ≥1% total in MPT and EA | Difference in proportion of total MPT vs EA (%) | χ <sup>2</sup> p-value (MPT vs EA) |
|---------------|----------------|-------------|-------------------|---------|---------------------------------------------------|-------------------------------------------------|------------------------------------|
| Breast        | Colorectal     | MPT         | 29                | 5.5     | YES                                               | 2.7                                             | 0.02145                            |
| Breast        | Ovary          | MPT         | 23                | 4.4     | YES                                               | 2.5                                             | 0.01786                            |
| Breast        | Endometrium    | MPT         | 20                | 3.8     | YES                                               | 0.1                                             | 0.8852                             |
| Breast        | NMSC           | MPT         | 19                | 3.6     | YES                                               | -10.2                                           | <0.00001                           |
| Breast        | Thyroid        | MPT         | 19                | 3.6     | NO                                                | 3.2                                             | 0.00007                            |
| Breast        | Hem Lymphoid   | MPT         | 18                | 3.4     | YES (note different classification MPT vs EA)     | 2                                               | 0.02594                            |
| Endometrium   | Ovary          | MPT         | 17                | 3.3     | YES                                               | 1.6                                             | 0.1073                             |
| Breast        | Melanoma       | MPT         | 14                | 2.7     | YES                                               | 0.6                                             | 0.5397                             |
| Breast        | CNS Meningioma | MPT         | 7                 | 1.3     | NO (Classified as "Brain" in EA)                  | 0.9                                             | 0.06944                            |
| Breast        | Kidney         | MPT         | 6                 | 1.1     | NO                                                | 0.9                                             | 0.04323                            |
| Breast        | Lung           | MPT         | 6                 | 1.1     | NO                                                | 0                                               | 0.252                              |
| Melanoma      | Thyroid        | MPT         | 6                 | 1.1     | NO                                                | 0.7                                             | 0.1204                             |
| Breast        | NMSC           | EA          | 79                | 13.8    | NO                                                | N/A                                             | N/A                                |
| Melanoma      | NMSC           | EA          | 64                | 11.1    | NO                                                | N/A                                             | N/A                                |
| Hematological | NMSC           | EA          | 29                | 5.1     | NO                                                | N/A                                             | N/A                                |
| NMSC          | Prostate       | EA          | 26                | 4.5     | NO                                                | N/A                                             | N/A                                |
| Breast        | Uterus         | EA          | 21                | 3.7     | NO                                                | N/A                                             | N/A                                |
| Breast        | Melanoma       | EA          | 19                | 3.3     | NO                                                | N/A                                             | N/A                                |
| Breast        | Ovary          | EA          | 11                | 1.9     | NO                                                | N/A                                             | N/A                                |
| Prostate      | Renal tract    | EA          | 10                | 1.7     | NO                                                | N/A                                             | N/A                                |
| Ovary         | Uterus         | EA          | 10                | 1.7     | NO                                                | N/A                                             | N/A                                |
| NMSC          | Thyroid        | EA          | 9                 | 1.6     | NO                                                | N/A                                             | N/A                                |
| Breast        | Hematological  | EA          | 8                 | 1.4     | NO                                                | N/A                                             | N/A                                |
| Breast        | Colorectal     | EA          | 16                | 2.8     | NO                                                | N/A                                             | N/A                                |
| Colorectal    | NMSC           | EA          | 14                | 2.4     | NO                                                | N/A                                             | N/A                                |
| Breast        | Cervix         | EA          | 7                 | 1.2     | NO                                                | N/A                                             | N/A                                |
| Hematological | Prostate       | EA          | 6                 | 1.0     | NO                                                | N/A                                             | N/A                                |
| NMSC          | Ovary          | EA          | 6                 | 1.0     | NO                                                | N/A                                             | N/A                                |
| NMSC          | Uterus         | EA          | 6                 | 1.0     | NO                                                | N/A                                             | N/A                                |

Only tumors occurring before age 60 included for consistency with registry data as obtained.

MPT – Multiple primary tumor series (data analyzed in this study). EA – East Anglia Registry Data.

CNS – Central nervous system, Hem – Hematological, NMSC - Non-melanoma skin cancer (includes basal cell carcinoma and squamous cell carcinoma).

## Supplemental References

1. Rahman, N. (2014). Realizing the promise of cancer predisposition genes. *Nature* 505, 302–308.
2. Finn, R.D., Coghill, P., Eberhardt, R.Y., Eddy, S.R., Mistry, J., Mitchell, A.L., Potter, S.C., Punta, M., Qureshi, M., Sangrador-Vegas, A., et al. (2015). The Pfam protein families database: towards a more sustainable future. *Nucleic Acids Res.* 44, D279–D285.
3. James Kent, W., Sugnet, C.W., Furey, T.S., Roskin, K.M., Pringle, T.H., Zahler, A.M., and Haussler, D. (2002). The human genome browser at UCSC. *Genome Res.* 12, 996–1006.
